# Supplementary material for: Activating oxygen deficient TiO2 in the visible region by Bi2MoO6 for CO2 photoreduction to methanol
Source: Royal Society of Chemistry journal article supplement (doi:10.1039/d2cc00490a), 2022-01-01
Supplement: d2cc00490a1.pdf [file d2cc00490a1.pdf]

Supporting Information for

## Activating Oxygen Deficient TiO<sub>2</sub> in visible Region by Bi<sub>2</sub>MoO<sub>6</sub> for CO<sub>2</sub> Photoreduction to Methanol

Risov Das,<sup>[a,b]</sup> Kousik Das,<sup>[a,b]</sup> Sathyapal R. Churipard<sup>[a,b]</sup> and Sebastian C. Peter\*<sup>[a,b]</sup>  
<sup>[a]</sup>New Chemistry Unit, Jawaharlal Nehru Centre for Advanced Scientific Research, Jakkur,  
Bangalore-560064  
<sup>[b]</sup>School of Advanced Materials, Jawaharlal Nehru Centre for Advanced Scientific  
Research, Jakkur, Bangalore-560064  
\*Email: [sebastiancp@jncasr.ac.in](mailto:sebastiancp@jncasr.ac.in), [sebastiancp@gmail.com](mailto:sebastiancp@gmail.com)

### 1. Synthesis of Catalysts<sup>1</sup>

#### 1.1 Materials

Titania P25 [TiO<sub>2</sub>, Alfa Aesar], sodium hydroxide [NaOH, Spectrochem], hydrochloric acid [HCl, Merck], sulfuric acid [H<sub>2</sub>SO<sub>4</sub>, Merck], ethylene glycol [(CH<sub>2</sub>OH)<sub>2</sub>, Sigma Aldrich], bismuth nitrate pentahydrate [Bi(NO<sub>3</sub>)<sub>3</sub>·5H<sub>2</sub>O, Alfa Aesar], sodium molybdate dihydrate [Na<sub>2</sub>MoO<sub>4</sub>·2H<sub>2</sub>O, Alfa Aesar]. All the chemicals used were commercially available certified reagents and used without further purification.

#### 1.2 Preparation of TiO<sub>2</sub> Nanobelts

P25 (0.2 g) was immersed in 40 mL of a 10 M NaOH solution. The suspension was transferred to a 50 mL Teflon-lined autoclave and maintained at 180 °C for 48 h. After washing thoroughly with deionized water, the obtained products were dissolved in a 0.1 M HCl solution for 48 h to obtain H<sub>2</sub>Ti<sub>3</sub>O<sub>7</sub> nanobelts, then the above products were immersed in a 0.02 M H<sub>2</sub>SO<sub>4</sub> solution and maintained at 180 °C for 10 h. After washing thoroughly with deionized water, the sample was annealed at 600 °C for 2h.

#### 1.3 Preparation of 2D Bi<sub>2</sub>MoO<sub>6</sub>/TiO<sub>2</sub> Heterostructure

Bi<sub>2</sub>MoO<sub>6</sub> nanoparticles/TiO<sub>2</sub> nanobelt heterostructures (mole ratios from 1:1 to 4:1) were synthesized by a coprecipitation hydrothermal method. Bi(NO<sub>3</sub>)<sub>3</sub>·5H<sub>2</sub>O (0.4-1.6 mmol), Na<sub>2</sub>MoO<sub>4</sub>·2H<sub>2</sub>O (0.2-0.8 mmol), and TiO<sub>2</sub> nanobelts (0.2 mmol) were immersed in 15 mL of ethylene glycol, respectively, and then were mixed together. The resulting suspension was maintained at 160 °C for 24 h in a 50 mL Teflon-lined autoclave. Finally, the products were washed thoroughly with deionized water. For comparison, pure Bi<sub>2</sub>MoO<sub>6</sub> nanoparticles were also synthesized in the same manner without the addition of TiO<sub>2</sub> nanobelts. We varied the ratio of Bi<sub>2</sub>MoO<sub>6</sub>:TiO<sub>2</sub> in the composition 1:1 (**Bi1@Ti1**), 2:1 (**Bi2@Ti1**) and 3:1 (**Bi3@Ti1**)

## **2. Characterization**

### **2.1 X-Ray Diffraction**

The structural phase of  $\text{Bi}_2\text{MoO}_6$  and  $\text{TiO}_2$  samples were confirmed by X-ray diffraction (XRD, Rigaku Advance X-ray diffractometer equipped with Cu  $\alpha$  lamp source for irradiation 1.5 Å).

### **2.2 Microscopy**

To understand morphology of material transmission electron microscopy (TEM) was taken using a JEOL 200 instrument and scanning electron microscopy was done using oxford instruments. Sample preparation was done by drop casting small amount of sonicated powder in ethanol on a carbon coated copper grid for TEM and little more concentrated solution was drop casted on silicon wafer.

### **2.3 Electron Spin resonance (ESR) Measurements**

10 mg sample was loaded in EPR tube (made of quartz) and EPR signal was detected by Bruker instrument. Before the experiment the instrument was standardised by standard Mn sample.

### **2.4 CO<sub>2</sub> Temperature Programmed Desorption (TPD):**

The CO<sub>2</sub> TPD analysis was performed in Altamira AMI-300 Lite instrument using 10% CO<sub>2</sub> in helium. In a typical procedure, around 150 mg of material was taken in the U-shaped TPD cell. The sample was pre-treated at 500 °C for 1h with a ramp rate of 10°C/min with Helium prior to the CO<sub>2</sub> treatment. The material was allowed to cool to 50 °C and it was saturated for 60 minutes with CO<sub>2</sub> by passing a mixture of gas containing 5 ml/min CO<sub>2</sub> and 45 ml/min helium. Further, the sample was flushed with helium to remove any physisorbed CO<sub>2</sub>. The TPD analysis was performed from 50 °C till 500 °C with a ramp rate of 10 °C/min and helium as carrier gas with a flow rate of 25 ml/min. The amount of CO<sub>2</sub> desorbed from the material was detected by the TCD detector. After every analysis the TCD response is calibrated to calculate the amount of CO<sub>2</sub> chemisorbed on the sample.

## **3. Photocatalytic Measurements**

A quartz photoreactor was used for CO<sub>2</sub> hydrogenation experiment under the illumination of 450 W xenon lamp (Newport) through UV cut-off filter (CGA 400 filter and KG2 filter). Using a power meter (Newport-843-R) the intensity of outputting light was measured. The measured intensity during catalytic reaction is 110 mW/cm<sup>2</sup>. (Note: The distance between light source and reactor is 10 cm). About 5 mg of the sample was well dispersed in 20 mL of 0.1 M NaOH by ultrasonication. Before illumination, the reaction setup was purged with N<sub>2</sub> to remove the air and then purged with high purity CO<sub>2</sub> for 45 minutes. During irradiation, 5 mL of the gaseous product from the setup was sampled, and ensuing study was done by GC (gas chromatography) (Agilent GC-7890 B) with TCD and FID detector and He carrier gas. This can detect up to 0.25 ppm of methane and 16 ppm CO. To further verify the products gas chromatography Mass Spectrometry (SHIMAZU GC-2010 PLUS) was used. Products were

quantified by using RT® Molecular sieve 5A column (45 m, 0.32 mm ID, 30 µm df) with a mass detector. The calibration was done by a standard gas mixture of H<sub>2</sub>, CO, CH<sub>4</sub> of different concentrations in ppm-level. It has a detection limit of 1 ppm for H<sub>2</sub>, CO and CH<sub>4</sub>. Another dedicated GC (Agilent 7890 B) with a TCD detector and Ar carrier gas used for the detection of H<sub>2</sub>. It can sense up to 10 ppm of H<sub>2</sub>. For liquid product analysis <sup>1</sup>H NMR (400 MHz, JEOL) and HPLC (Agilent 1220 Infinity II LC system) were employed. The following protocol was applied for the <sup>1</sup>H NMR analysis. 500 µL of the solvent (after filtration) and 10 µL of an internal standard solution were transferred into a centrifuge tube. The internal standard solution consisted of 50 mM phenol (99.5 %) and 10 mM dimethyl sulfoxide (99.9 %) made in D<sub>2</sub>O solvent. The mixture is transferred into an NMR tube. Blank tests were conducted in the absence of CO<sub>2</sub> and light to confirm that these two factors are key for photocatalytic CO<sub>2</sub> reduction reaction. Used photocatalyst was amassed after each test and washed with water, and its performance was rechecked by the similar procedure. Rate of the product formation was calculated by considering maximum rate at 6<sup>th</sup> hour for all the catalysts. <sup>13</sup>CO<sub>2</sub> was purged for 20 minutes and the reaction was continued for 2h. Then the products were checked by GC-MS to confirm the source of CO and CH<sub>3</sub>OH is CO<sub>2</sub>. All the photocatalytic reactions were done in an air conditioning room (22 °C). The local heat generated on the catalyst surface during light illumination was checked by infrared temperature gun (GM320) and it was not more than 45°C. Maintaining all the conditions similar to the reaction was done at 45°C in absence of light. However, no product was detected. This proves that the local heating due to light illumination does not affect the catalytic performance.

### 3.1 Role of basic medium in Photocatalytic CO<sub>2</sub> RR study

Basic solution was used to increase the solubility of CO<sub>2</sub> in the reaction medium. Dissolution of CO<sub>2</sub> in water follows three chemical reactions.

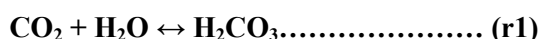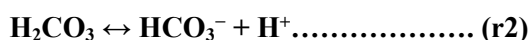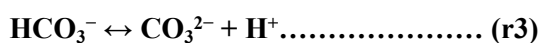

Hydroxide consumes protons and promotes r1 and r2 reaction. Reaction r2 depletes H<sub>2</sub>CO<sub>3</sub>. As a result, reaction (r1) is also forced to shift towards right. The net result is more CO<sub>2</sub> residing in solution (dissolved) as the solution becomes more basic in nature.

### 3.2 Apparent quantum yield (AQY) calculation<sup>2</sup>

The wavelength dependent AQY of CO<sub>2</sub> photo-reduction by comp14 were calculated using different monochromatic light source. Therefore, 6 (400±10 nm, 425±10 nm, 450±10 nm, 475±10 nm, 500±10 nm, 550±10 nm) different bandpass filters obtained from light source manufacturer (Newport) were used to obtain the monochromatic wavelengths and Newport-843-R power meter was used to

measure the incident light intensity. After 6 hours of CO<sub>2</sub> reduction the AQY was estimated from the following equation:

$$AQY(\%) = \frac{\text{Number of reacted electrons}}{\text{Number of incident photons}} \times 100\%$$

Number of reacted electrons were calculated from the yield of CO<sub>2</sub> reduced products (here selectively methane was obtained). Because different number of electrons are required for the formation of different products, the total number of reacted electrons are

$$\text{Number of reacted electrons} = [6n(\text{CH}_4) + 2n(\text{H}_2) + 2n(\text{CO})] \times N_A$$

$n(\text{CH}_4)$ , is the yields of methane.  $N_A$  is Avogadro's number.

Number of incident photons are calculated from the following equation:

$$\text{Number of incident photons} = \frac{PS\lambda t}{hc}$$

where,  $P$  is the power density of the incident monochromatic light (W/m<sup>2</sup>),  $S$  (m<sup>2</sup>) is the irradiation area,  $t$  (s) is the duration of the incident light exposure and  $\lambda$  (m) is the wavelength of the incident monochromatic light.  $h$  (Js) and  $c$  (m/s) correspond to planks constant and speed of light respectively.

Combining these two equations the AQY(%) for different monochromatic light was calculated. For example, the AQY(%)@400 nm is shown here-

$n(\text{CH}_3\text{OH}) = 18.4 \mu\text{mol/g}$ ,  $n(\text{H}_2) = 2.8 \mu\text{mol/g}$ ,  $n(\text{CO}) = 9.4 \mu\text{mol/g}$ ,  $N_A = 6.023 \times 10^{23} \text{ mol}^{-1}$ ,  $P = 44 \times 10^{-3} \text{ W/cm}^2$ ,  $S = 4.52 \text{ cm}^2$ ,  $l = 400 \text{ nm}$ ,  $t = 6\text{h}$ ,  $h = 6.626 \times 10^{-34} \text{ Joule second}$ ,  $c = 3 \times 10^8 \text{ m/s}$

AQY(%)@400 nm

$$= \frac{[(18.4 \times 6) + (2.8 \times 2) + (9.4 \times 2) \times 10^{-6}] \times 6.02 \times 10^{23}}{1} \times \frac{6.626 \times 10^{-34} \times 3 \times 10^8}{44 \times 10^{-3} \times 4.52 \times 400 \times 10^{-9}} \times 100\%$$

= 0.89%

Similarly, AQY were calculated for 425 nm, 450 nm, 475 nm, 500nm, 550nm.

#### 4. The ultraviolet-visible diffuse reflectance spectrum (UV-vis DRS)

UV-vis spectra was obtained in the range of 250 to 800 nm by using a Perkin-Elmer Lambda 900 UV/Vis/Near- IR spectrophotometer in reflectance mode for BiVO<sub>4</sub>, WO<sub>3</sub> and composites. with an integrating sphere attachment. BaSO<sub>4</sub> was used as a 100% reflectance standard. The absorption was calculated data using the Kubelka–Munk equation,  $\alpha/S = (1 - R)^2/2R$ , where  $R$  is the reflectance and  $\alpha$

and  $S$  are the absorption and scattering coefficients, respectively.<sup>3</sup> Band gap was derived using Tauc plot.

## 5. Photoluminescence (PL)

PL spectra of all the solid samples were recorded at room temperature on a steady state Luminescence spectrometer Perkin-Elmer (LS 55) at different excitation wavelength.

## 6. Time resolved photoluminescence

Photoluminescence decay profiles were recorded using a Horiba Delta Flex time correlated single-photon-counting (TCSPC) instrument. A 520 nm laser diode with a pulse repetition rate of 1 MHz was used as the light source. The instrument response function (IRF) was collected using a scatterer (Ludox AS40 colloidal silica, Sigma-Aldrich).

## 7. Photoelectrochemical Measurements

The transient photocurrent measurements under dark and light were done in a three-electrode system using a Orignalys potentiostat under the illumination of a solar simulator (Newport) with an ultraviolet (UV) ( $\lambda > 400$  nm) cut-off filter (CGA-400). Hg/Hg<sub>2</sub>Cl<sub>2</sub> (SCE) was reference electrode, and platinum as the counter electrode was used. The slurry was prepared by adding 10 mg of the sample, 200  $\mu$ L of Nafion (5%), and 1 mL of isopropyl alcohol to fabricated photoelectrodes. The obtained paste was spin-coated on FTO with 1 cm<sup>2</sup> area to get a homogenous film. All samples were spin coated on fluorine-doped tin oxide (FTO) which were used as working electrode. 0.5 M Na<sub>2</sub>SO<sub>4</sub> was taken as electrolyte for Nyquist plot and Mott-Schottky measurement. Mott-Schottky (MS) plots were recorded at a scan rate of 10 mV/s in Na<sub>2</sub>SO<sub>4</sub> neutral solution in the light at a frequency of 75 kHz. The obtained values (w.r.t SCE) was converted w.r.t NHE by adding 0.20 V. Photocurrent was obtained by 10s light on and 10s off experiment with sample spin coated on FTO electrode in 0.1M NaOH solution.

## 8. In-situ Photocatalytic Fourier Transform Infrared Spectroscopy (FT-IR)

In-situ photochemical FT-IR spectroscopic studies were performed using a purged VERTEX FT-IR spectrometer equipped with the A530/P accessory and a mid-band Mercury Cadmium Telluride (MCT) detector (**Scheme S1b**). Spectra was recorded after 100 scans with a resolution of 4 cm<sup>-1</sup>. A DRIFTS cell with a quartz window was used to perform catalytic experiment. Prior to catalytic testing, 5 mg of the sample was placed in the DRIFTS cell and treated in flowing N<sub>2</sub> for 30 min to remove impure gas mixtures. Then, CO<sub>2</sub> and water vapor were injected through rubber septa and light was illuminated through the quartz window for 150 minutes. Just before the light exposure on the DRIFTS cell the zero-minute data was collected and after that, data was collected every 10 minutes for 150 minutes.

## Tables

**Table 1.** Amount of CO<sub>2</sub> chemisorbed on the sample calculated from CO<sub>2</sub> TPD analysis.

| Sample             | CO <sub>2</sub> uptake (( $\mu\text{mol/g}$ )) |
|--------------------|------------------------------------------------|
| TiO <sub>2</sub>   | 0.53                                           |
| TiO <sub>2-x</sub> | 1.85                                           |

**Table 2.** Summering photocatalytic activity of all the sample.

| Sample  | CO ( $\mu\text{mol/h/g}$ ) | H <sub>2</sub> ( $\mu\text{mol/h/g}$ ) | CH <sub>3</sub> OH ( $\mu\text{mol/h/g}$ ) |
|---------|----------------------------|----------------------------------------|--------------------------------------------|
| Bi      | 1.3                        | 0.5                                    | 1.9                                        |
| Bi3@Ti1 | 13.16                      | 3                                      | 14.7                                       |
| Bi2@Ti1 | 16.21                      | 5.1                                    | 27.1                                       |
| Bi1@Ti1 | 8                          | 2.2                                    | 4.9                                        |
| Ti (FA) | 6.8                        | 16                                     | 2.1                                        |
| Ti (V)  | 0.7                        | 1                                      | 0.2                                        |

**Table 3.** Comparing photocatalytic activity of our sample and best results reported with TiO<sub>2</sub> for methanol formation upon CO<sub>2</sub> photo reduction. NM: Not mentioned.

| Catalyst                                          | Reduction medium)                            | Sacrificial agent | Light source             | Product                                 | Maximum Evolution rate ( $\mu\text{mol g}^{-1}\text{h}^{-1}$ ) |
|---------------------------------------------------|----------------------------------------------|-------------------|--------------------------|-----------------------------------------|----------------------------------------------------------------|
| Bi3@Ti1                                           | 20 ml 0.1M NaOH soln.                        | No                | 450W Xe Lamp             | CO, CH <sub>3</sub> OH                  | CH <sub>3</sub> OH:14.7                                        |
| Bi2@Ti1                                           | 20 ml 0.1M NaOH soln.                        | No                | 450W Xe Lamp             | CO, CH <sub>3</sub> OH                  | CH <sub>3</sub> OH:27.1                                        |
| Bi1@Ti1                                           | 20 ml 0.1M NaOH soln.                        | No                | 450W Xe Lamp             | CO, CH <sub>3</sub> OH                  | CH <sub>3</sub> OH:4.9                                         |
| <sup>4</sup> TiO <sub>2</sub> @GaP                | 0.5M NaCl                                    | No                | NM                       | CH <sub>3</sub> OH                      | CH <sub>3</sub> OH: 0.75                                       |
| <sup>5</sup> CeO <sub>2</sub> @TiO <sub>2</sub>   | 0.1M NaOH                                    | No                | 500 W Xe lamp            | CH <sub>3</sub> OH                      | CH <sub>3</sub> OH: 3.2                                        |
| <sup>6</sup> CdSe/Pt/TiO <sub>2</sub>             | Water                                        | No                | NM ( $\lambda > 400$ nm) | CH <sub>3</sub> OH, CO, CH <sub>4</sub> | CH <sub>3</sub> OH: 3.3 ppm/g/h                                |
| <sup>7</sup> TiO <sub>2</sub> /GO                 | KOH solution                                 | No                | 250 W Hg lamp            | CH <sub>3</sub> OH, CH <sub>4</sub>     | CH <sub>3</sub> OH: 2.2                                        |
| <sup>8</sup> Amine functionalize TiO <sub>2</sub> | NaHCO <sub>3</sub> solution                  | No                | 300 W Xe lamp            | CH <sub>3</sub> OH, HCOOH               | CH <sub>3</sub> OH: 2                                          |
| <sup>9</sup> Fluorinated TiO <sub>2</sub>         | NaOH solution                                | No                | 18 W lamp                | CH <sub>3</sub> OH, CH <sub>4</sub>     | CH <sub>3</sub> OH: 1.09                                       |
| <sup>10</sup> WSe <sub>2</sub> /Graphene          | Na <sub>2</sub> SO <sub>3</sub> aq. Solution | No                | 300 W Xe lamp            | CH <sub>3</sub> OH                      | CH <sub>3</sub> OH:6.33                                        |

|                                                                      |              |    |                                                                                 |                                            |                         |
|----------------------------------------------------------------------|--------------|----|---------------------------------------------------------------------------------|--------------------------------------------|-------------------------|
| /TiO <sub>2</sub>                                                    |              |    |                                                                                 |                                            |                         |
| <sup>11</sup> Carbon@TiO <sub>2</sub>                                | Water vapour | No | 300 W Xe lamp                                                                   | CH <sub>3</sub> OH, CH <sub>4</sub>        | CH <sub>3</sub> OH:9.1  |
| <sup>12</sup> TiO <sub>2</sub> /SBA-15                               | Water        | No | 100 W Hg lamp<br>( $\lambda > 250$ nm). N.B:<br>here they have<br>used UV light | CH <sub>3</sub> OH, CH <sub>4</sub>        | CH <sub>3</sub> OH:27.7 |
| <sup>13</sup> 2.5%CuInS <sub>2</sub> /TiO <sub>2</sub>               | Water        | No | 350 W Xe lamp                                                                   | CH <sub>3</sub> OH, CH <sub>4</sub>        | CH <sub>3</sub> OH:0.86 |
| <sup>14</sup> SCN-H-Ni-black TiO <sub>2</sub>                        | Water vapour |    | NM                                                                              | CH <sub>3</sub> CHO,<br>CH <sub>3</sub> OH | CH <sub>3</sub> OH:1.2  |
| <sup>15</sup> Bi <sub>2</sub> MoO <sub>6</sub> /PVP                  | Water        | No | 300 W Xe lamp                                                                   | CH <sub>3</sub> OH                         | CH <sub>3</sub> OH:6.2  |
| <sup>16</sup> Ultra-thin Bi <sub>2</sub> MoO <sub>6</sub> Nano sheet | Water        | No | 300 W Xe lamp                                                                   | CO                                         | CO:3.62                 |

**Table 4.** Calculation of excited state life time by fitting time resolved photo-luminescence data using the given equation.  $A+B_1\exp(-t/\tau_1)+B_2\exp(-t/\tau_2)$ . where,  $B_1$  and,  $B_2$  are the pre-exponential factor (amplitude) corresponding to decay lifetimes  $\tau_1$  and  $\tau_2$  respectively. Here  $\tau_{avg}$  is the average life time and  $\chi$  is goodness of fit.<sup>17</sup>

| Catalyst                          | $\tau_1$ (ns) | $B_1$ (%) | $\tau_2$ (ns) | $B_2$ (%) | $\tau_{avg}$ (ns) | $\chi^2$ |
|-----------------------------------|---------------|-----------|---------------|-----------|-------------------|----------|
| Bi <sub>2</sub> MoO <sub>6</sub>  | 0.6           | 53        | 4             | 47        | 2.2               | 1.19     |
| Bi <sub>2</sub> @TiO <sub>2</sub> | 1.55          | 64        | 4.72          | 36        | 2.7               | 1.05     |

## Figures

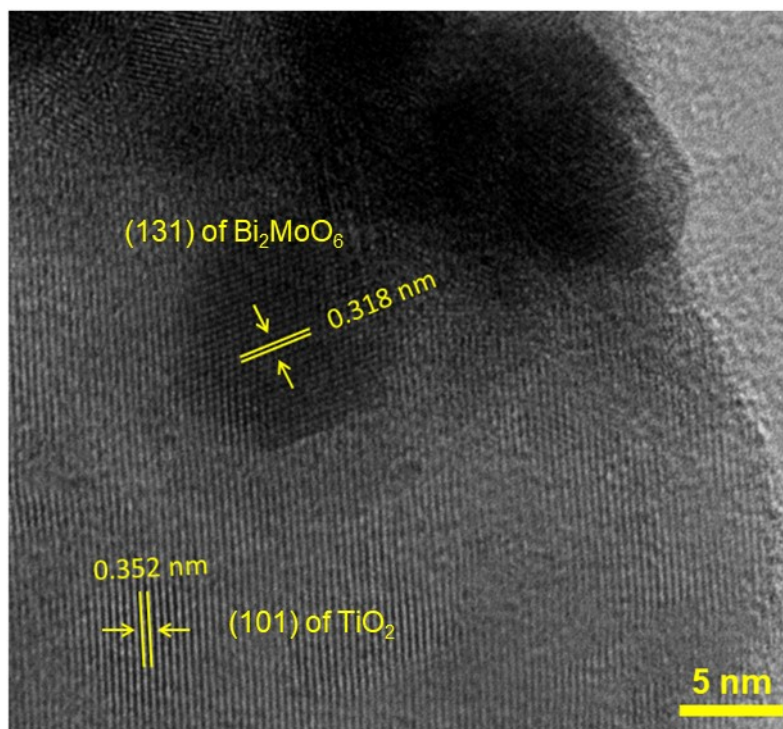

**Fig. S1** HRTEM image of Bi<sub>2</sub>@TiO<sub>2</sub> composite shows the presence of Bi<sub>2</sub>MoO<sub>6</sub> (131) plane and TiO<sub>2</sub> (101) plane. Higher molecular weight of Bi<sub>2</sub>MoO<sub>6</sub> makes darker image compared to the TiO<sub>2</sub>. The different d-spacing and colour contrast further implies that Bi<sub>2</sub>MoO<sub>6</sub> and TiO<sub>2</sub> are held together in composite.



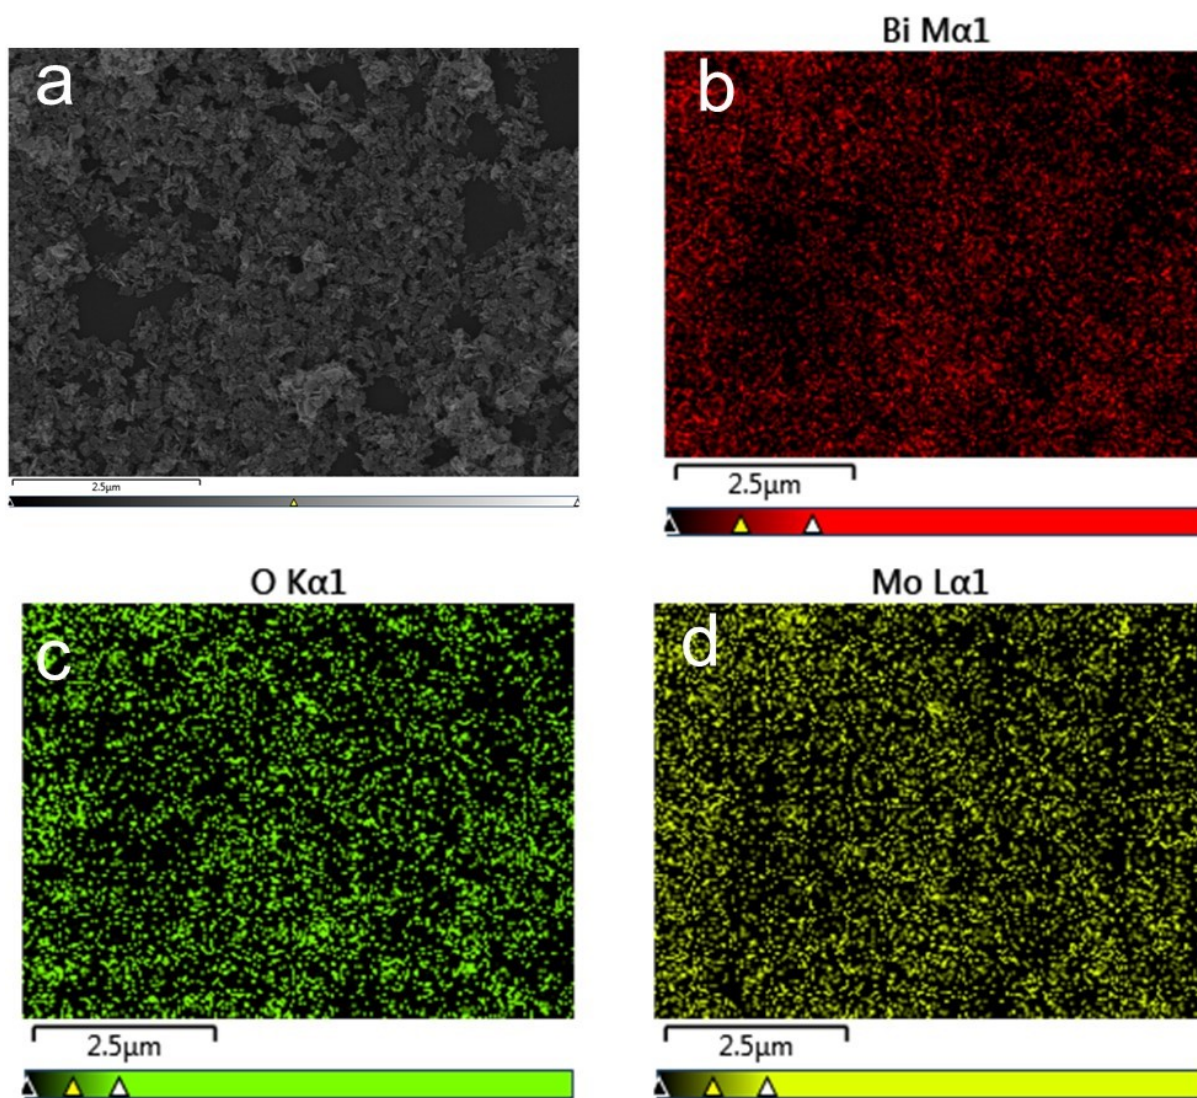

**Fig. S2** (a) SEM image of pristine Bi<sub>2</sub>MoO<sub>6</sub>. SEM-EDX elemental mapping images showing uniform distribution of (b) Bi (c) O and (d) Mo for pristine Bi<sub>2</sub>MoO<sub>6</sub>.



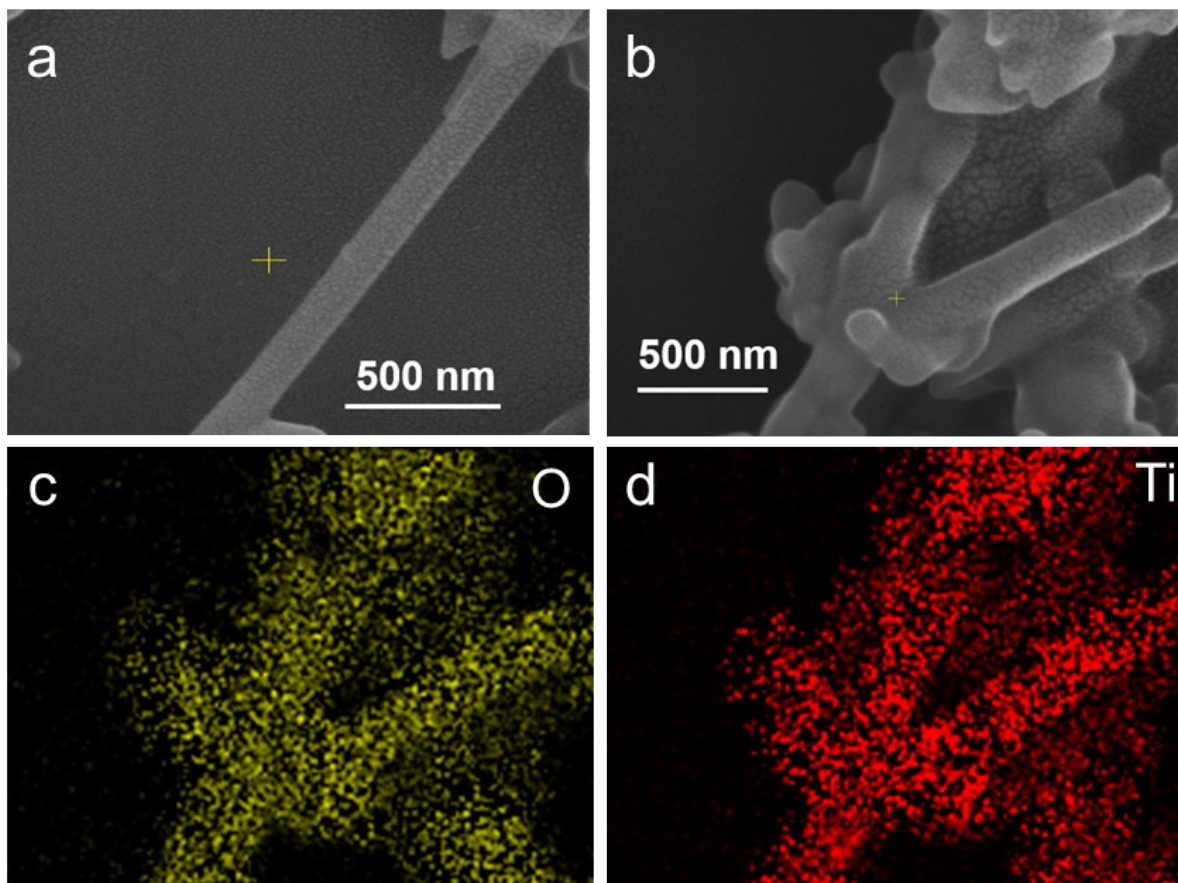

**Fig. S3** (a, b) SEM image of pristine  $\text{Bi}_2\text{MoO}_6$  taken in 2 different regions. SEM-EDX elemental mapping images showing uniform distribution of (c) O and, (d) Ti for pristine  $\text{TiO}_2$ . Colour mapping was taken on SEM image shown in Fig. S3b.

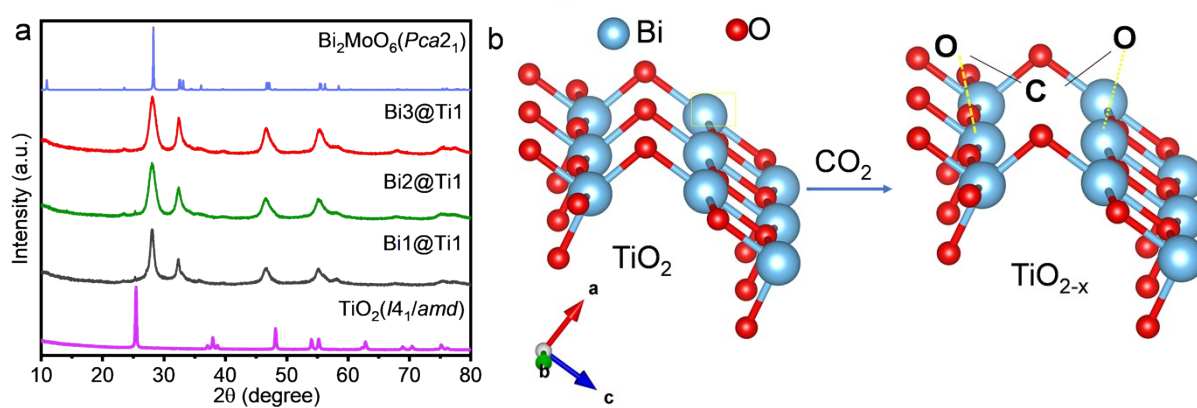

**Fig. S4** (a) PXR all the composites and as synthesised pristine  $\text{TiO}_2$  and simulated pattern of  $\text{Bi}_2\text{MoO}_6$ . (b) Schematic representation of  $\text{CO}_2$  adsorption in 'O' deficient  $\text{TiO}_2$ .

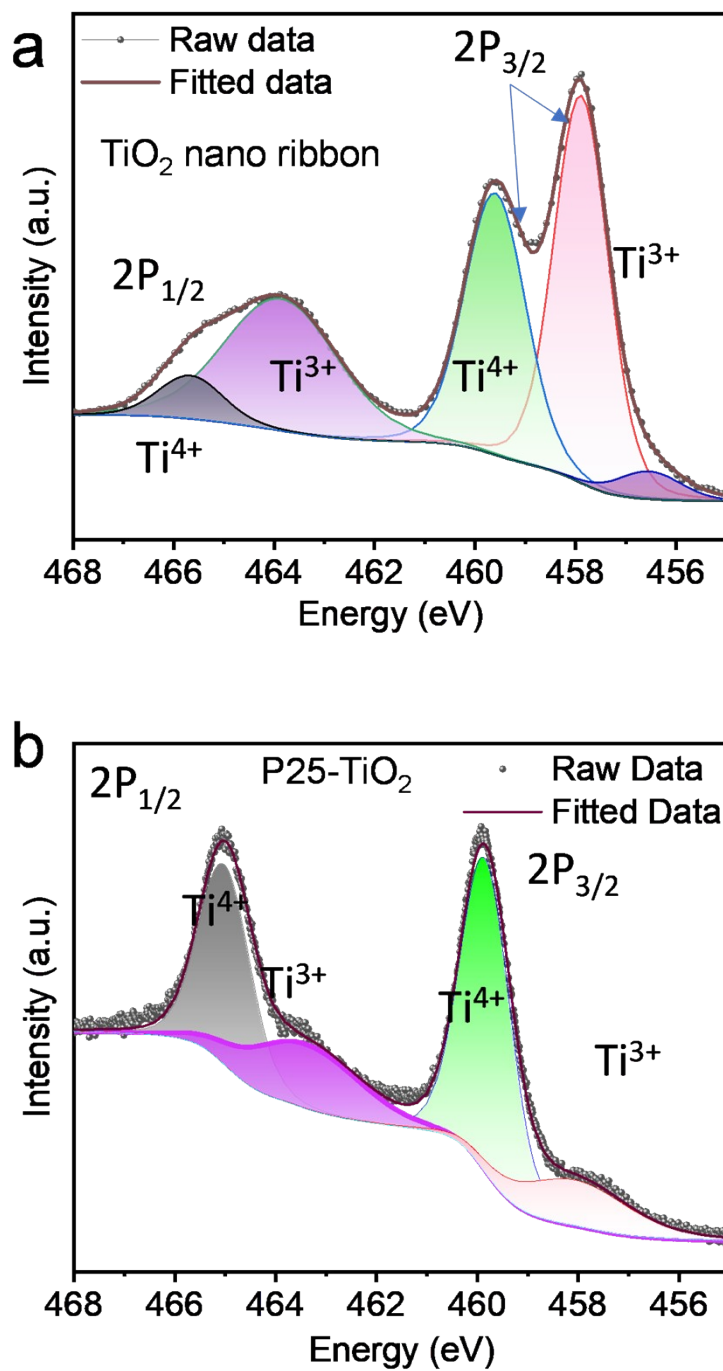

**Fig. S5** Ti 2p XPS spectra for understanding the presence of Ti<sup>3+</sup> and Ti<sup>4+</sup> in (a) TiO<sub>2</sub> nano ribbon and, (b) commercially available P25 TiO<sub>2</sub>.

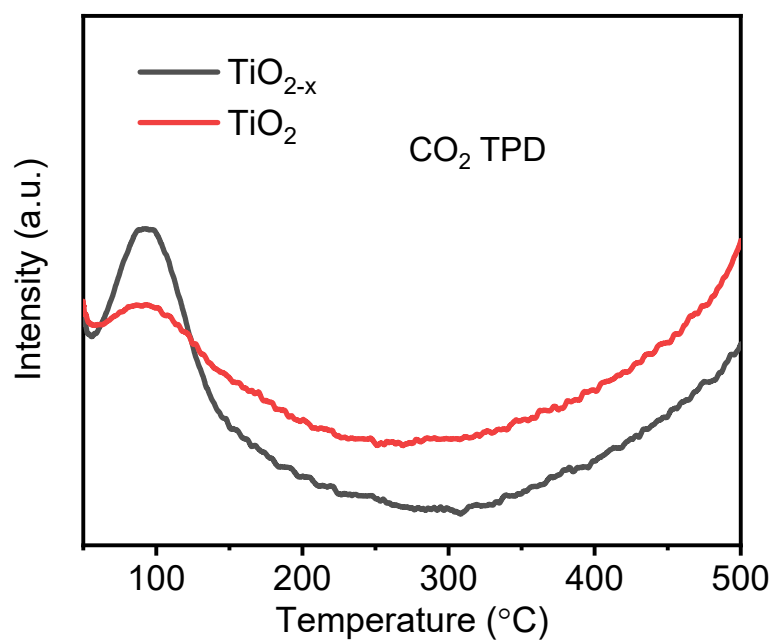

Fig. S6 CO<sub>2</sub> TPD profiles of TiO<sub>2</sub> and oxygen deficient TiO<sub>2</sub> (TiO<sub>2-x</sub>).

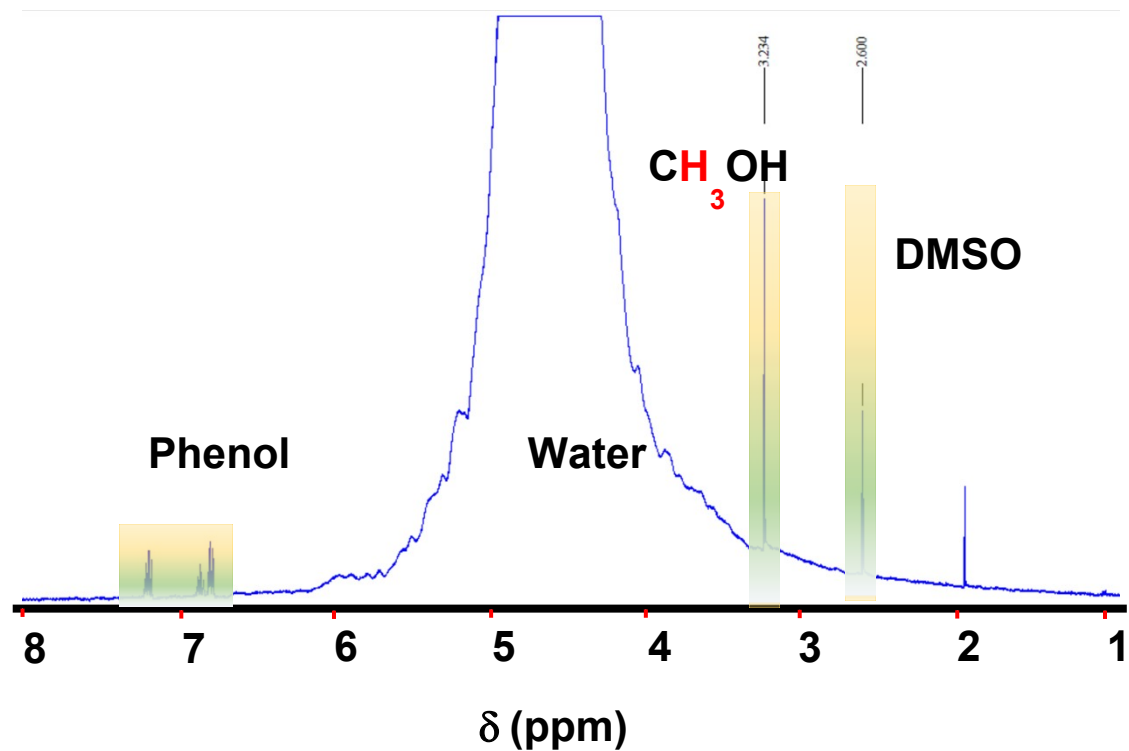

Fig. S7 NMR spectrum of liquid products generated after 6h reaction with Bi2@Ti1 catalyst.

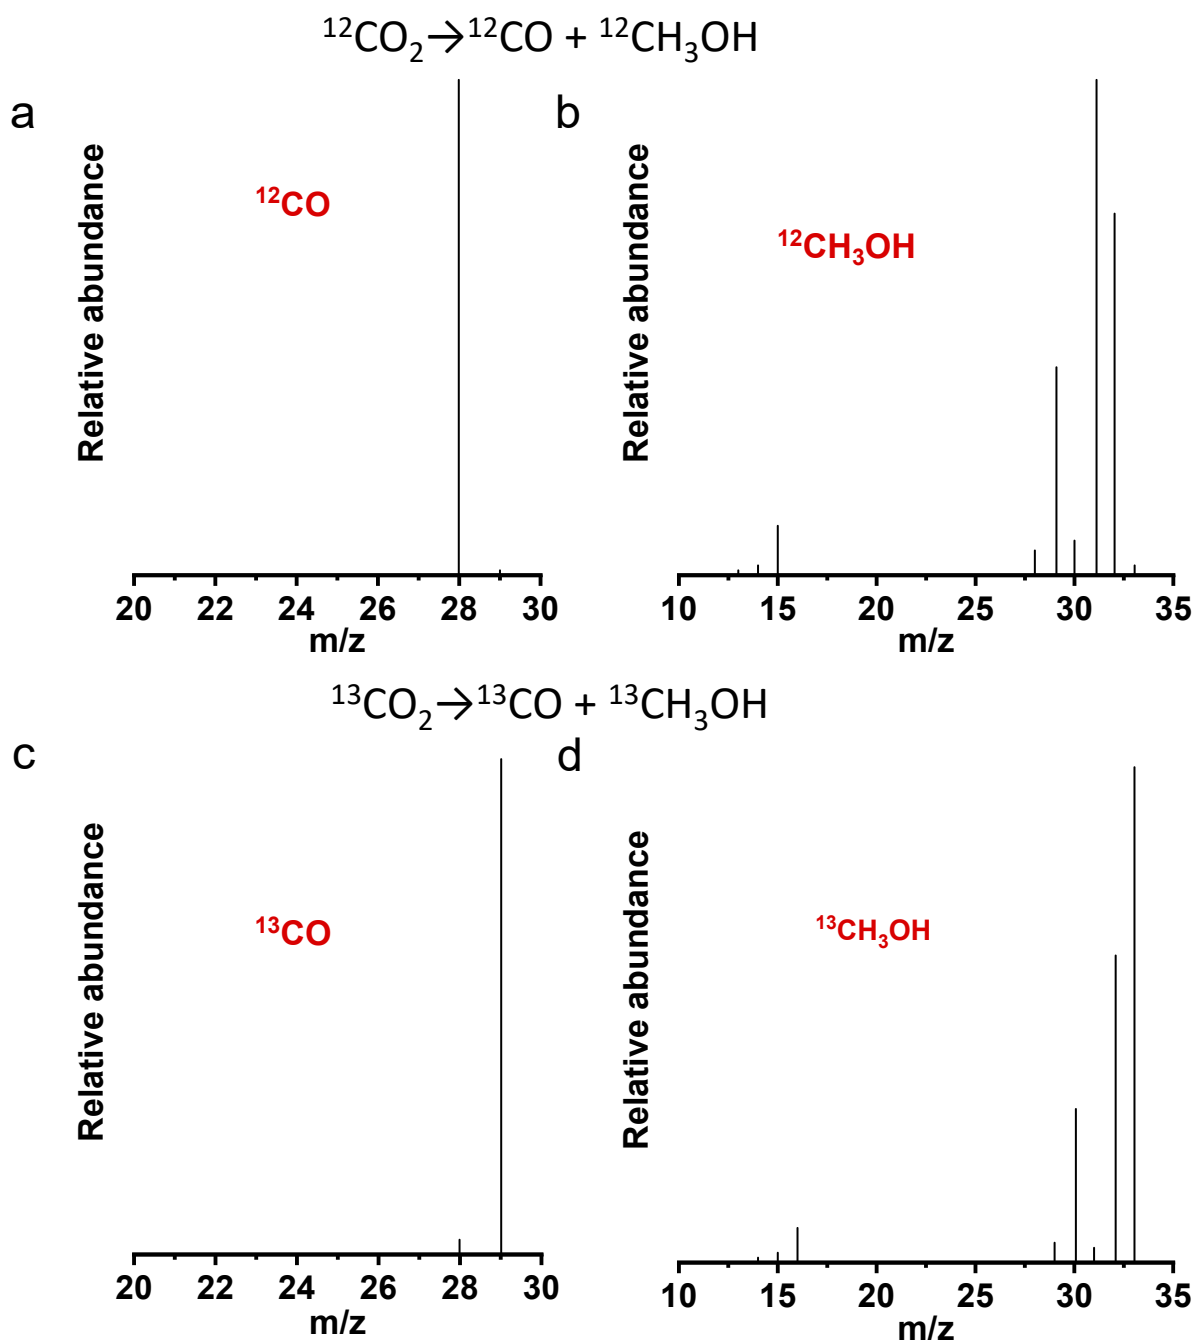

**Fig. S8** GC-MS data of (a) CO and (b) methanol obtained after the experiment with  $^{12}\text{CO}_2$  by Bi2@Ti1 catalyst. MS signal for (c)  $^{13}\text{CO}$  and (d)  $^{13}\text{CH}_3\text{OH}$  obtained after the catalysis with  $^{13}\text{CO}_2$  by Bi2@Ti1.

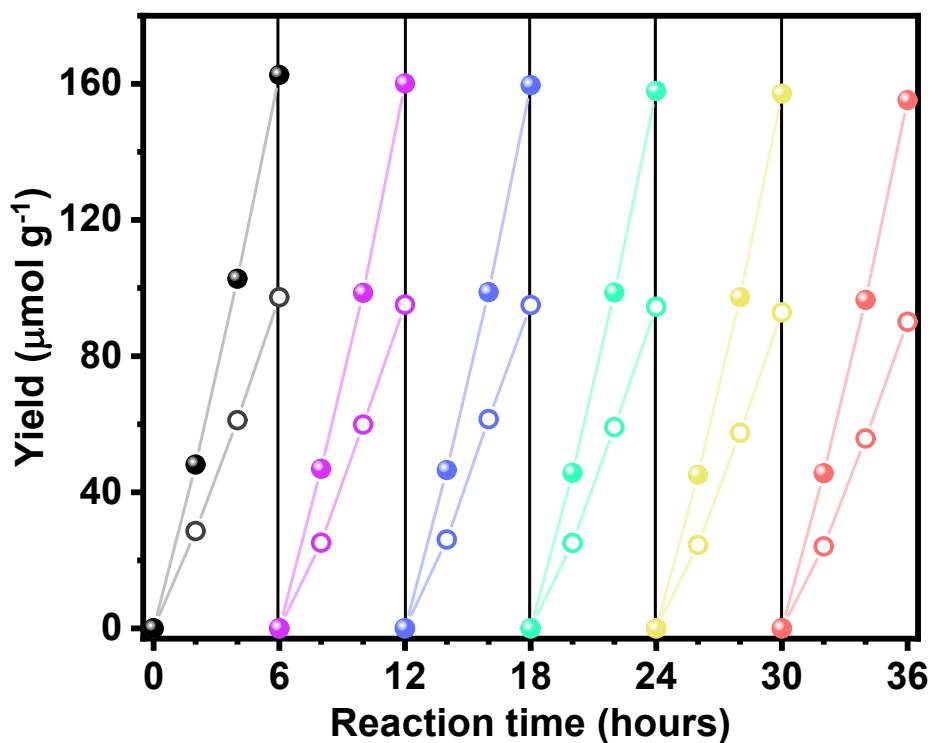

**Fig. S9** Yield of methanol and CO after 6h of photocatalysis with Bi2@Ti1 for 6 consecutive cycles with same spent catalyst and new batch of CO<sub>2</sub> and reaction solvent (20ml 0.1M NaOH solution). Data collection was done after each 2 hours for one single cycle.

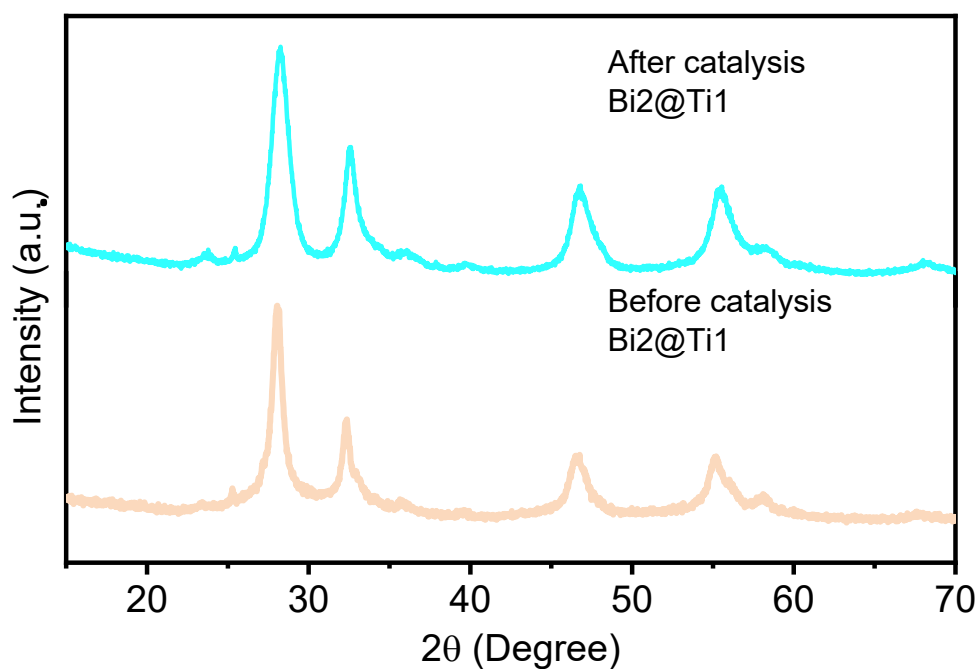

**Fig. S10** Post catalytic catalyst characterization by PXRD. Bi2@Ti1 was employed for 6 catalytic cycles and then post catalytic XRD analysis was done.

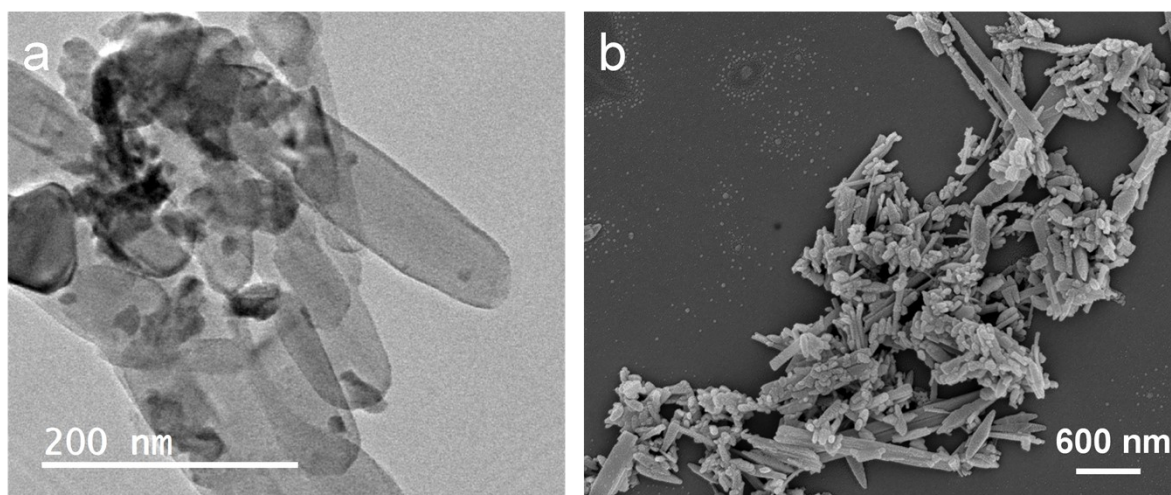

**Fig. S11** Post catalytic Characterization of Bi<sub>2</sub>@Ti<sub>1</sub> catalyst via (a) TEM and (b) SEM analysis. It showed TiO<sub>2</sub> and Bi<sub>2</sub>MoO<sub>6</sub> are having ribbon and particle like morphology upon base and light treatment meaning no chemical or photo corrosion occurred after 6 cycles.

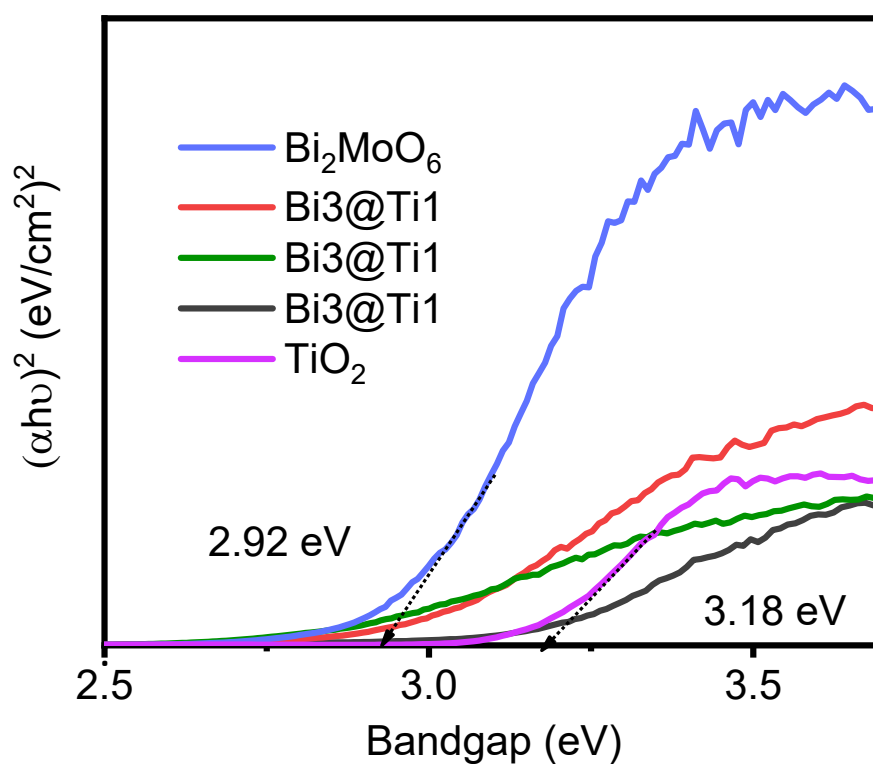

**Fig. S12** Tauc plot of Bi<sub>2</sub>MoO<sub>6</sub>, TiO<sub>2</sub> and their composites obtained from the absorbance (UV-DRS) measurements.  $n = 2$  refers that these are direct band gap semiconductors. Here  $n$  means the power given in the y-axis:  $(\alpha h\nu)^n$ .



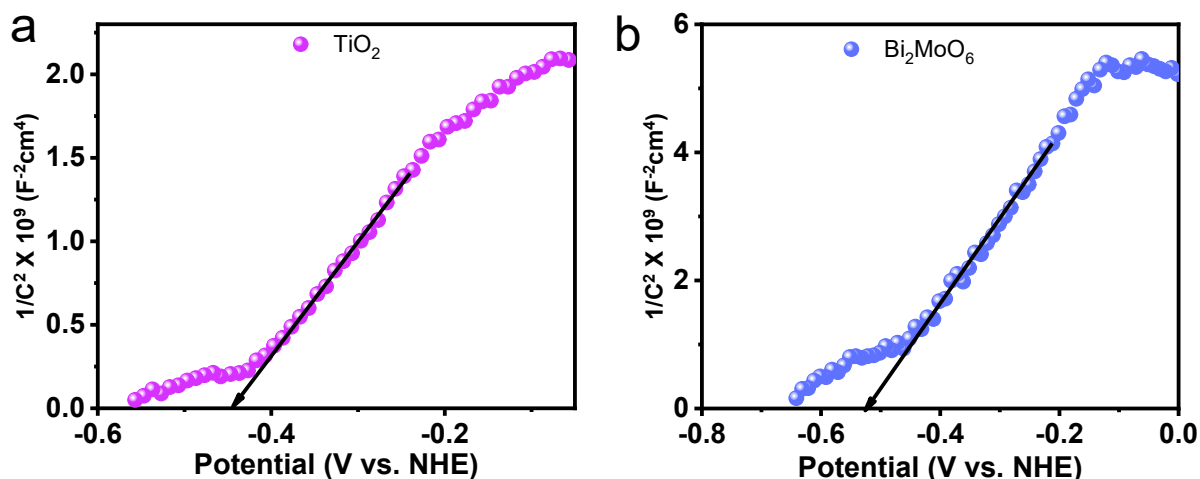

**Fig. S13** Mott-Schottky measurements for (a)  $\text{TiO}_2$  and (b)  $\text{Bi}_2\text{MoO}_6$  to understand flat-band potential ( $V_{fb}$ ). The extrapolation of slope on X-axis (as shown by arrow) is regarded as  $V_{fb}$ . The negative slope of impedance inferring that these two are n-type semiconductor.

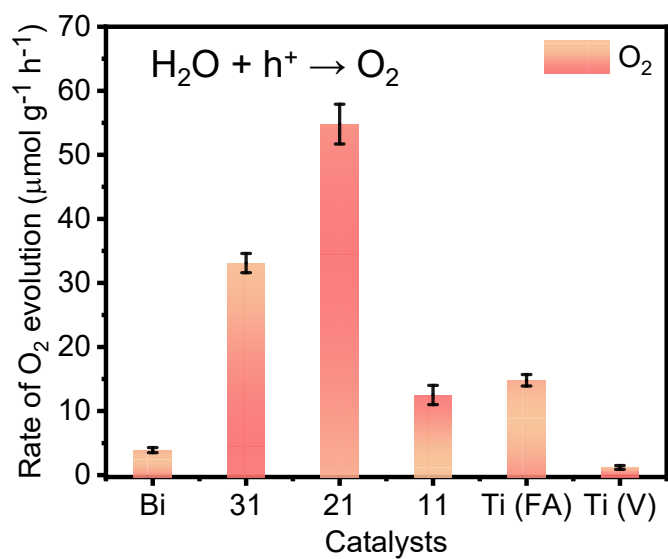

**Fig. S14** Quantification of evolved  $\text{O}_2$  generated from water oxidation by photogenerated holes. Based on the obtained products ( $\text{CH}_3\text{OH}$ ,  $\text{CO}$  and,  $\text{H}_2$ ), the stoichiometric equations of  $\text{O}_2$  formations are given below.

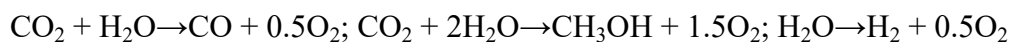

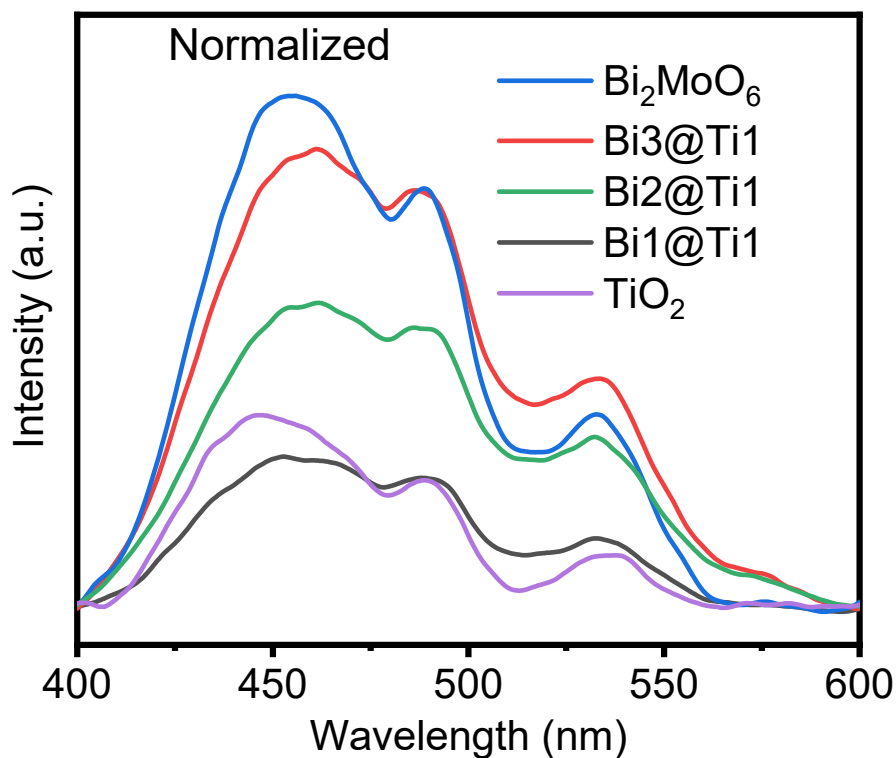

**Fig. S15** Steady state photoluminescence (PL) of composites and pristine individuals obtained upon 330 nm light excitation.

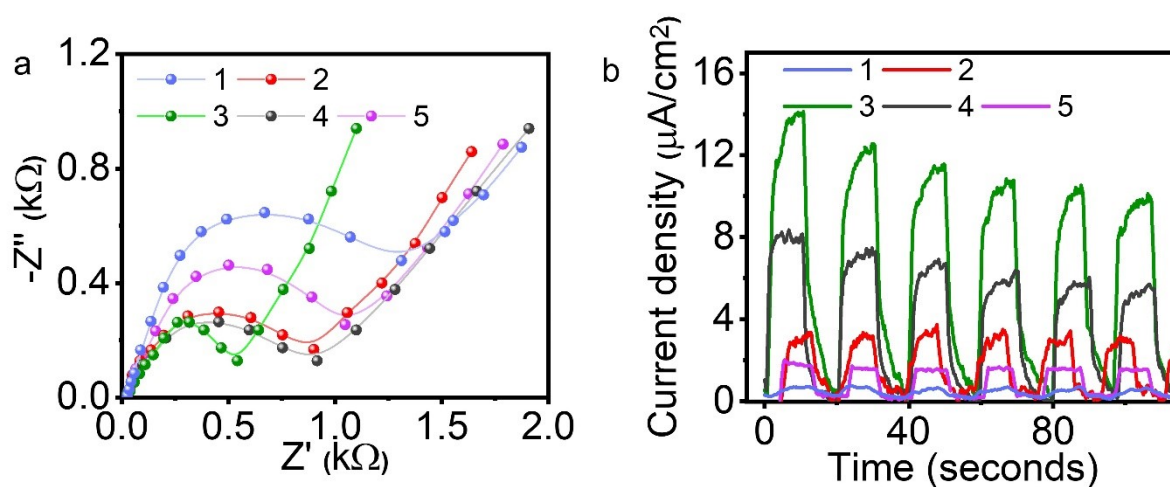

**Fig. S16 Photoelectrochemical study** (a) Electrochemical impedance spectra for understanding interfacial charge transfer resistance. (b) Transient photocurrent measurements in presence of light and dark for understanding light driven current generation ability of different photocatalysts. Here, in fig. e & f, the number 1, 2, 3, 4 and, 5 represents  $\text{Bi}_2\text{MoO}_6$ ,  $\text{Bi}_3@\text{Ti}_1$ ,  $\text{Bi}_2@\text{Ti}_1$ ,  $\text{Bi}_1@\text{Ti}_1$  and  $\text{TiO}_2$ , respectively.

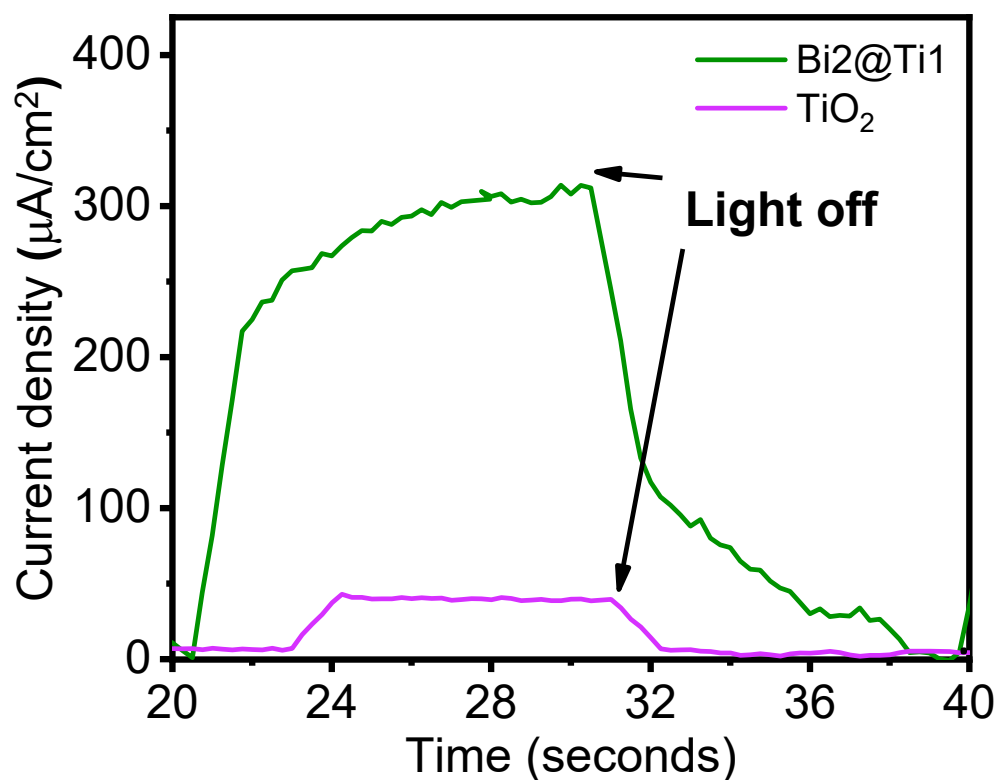

**Fig. S17** Photocurrent of Bi2@Ti1 and TiO<sub>2</sub> for one cycle shows that photocurrent diminishes faster in case of TiO<sub>2</sub> compared to Bi2@Ti1 upon light off. Photocurrent of TiO<sub>2</sub> generated upon UV-visible light illumination.

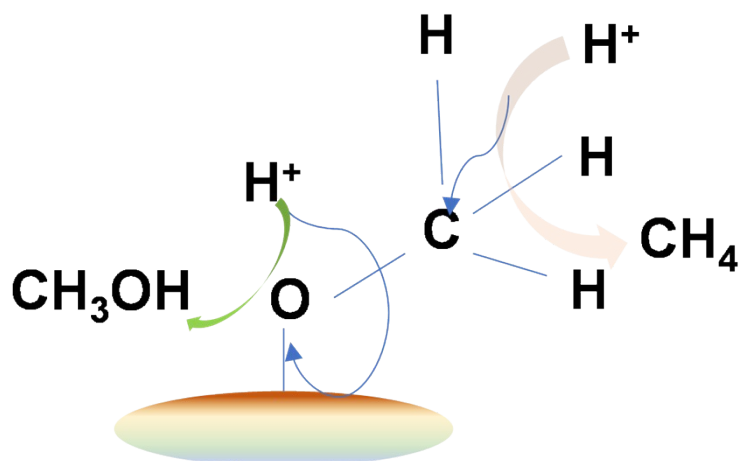

**Fig. S18** Schematic representation of methanol and methane formation upon protonation in 'O' centre and 'C' centre of \*OCH<sub>3</sub>.

## Reference

- 1 J. Tian, P. Hao, N. Wei, H. Cui and H. Liu, *ACS Catal.*, 2015, **5**, 4530-4536.
- 2(a) Q. Wang, J. Warnan, S. Rodríguez-Jiménez, J. J. Leung, S. Kalathil, V. Andrei, K. Domen and E. Reisner, *Nat. Energy*, 2020, **5**, 703-710; (b) D. Zhao, Y. Wang, C.-L. Dong, Y.-C. Huang, J. Chen, F. Xue, S. Shen and L. Guo, *Nat. Energy*, 2021, **6**, 388-397.
- 3 J. Shi, J. Ye, Z. Zhou, M. Li and L. Guo, *Chem. Eur. J.*, 2011, **17**, 7858-7867.
- 4 G. Zeng, J. Qiu, Z. Li, P. Pavaskar and S. B. Cronin, *ACS Catal.*, 2014, **4**, 3512-3516.
- 5 H. Abdullah, M. R. Khan, M. Pudukudy, Z. Yaakob and N. A. Ismail, *J. Rare Earths*, 2015, **33**, 1155-1161.
- 6 C. Wang, R. L. Thompson, J. Baltrus and C. Matranga, *J. Phys Chem Lett.*, 2010, **1**, 48-53.
- 7 J. Liu, Y. Niu, X. He, J. Qi and X. Li, *J. Nanomater.*, 2016, **2016**, 6012896.
- 8 S. Liu, J. Xia and J. Yu, *ACS Appl. Mater. Interfaces*, 2015, **7**, 8166-8175.
- 9 Z. He, L. Wen, D. Wang, Y. Xue, Q. Lu, C. Wu, J. Chen and S. Song, *Energy & Fuels*, 2014, **28**, 3982-3993.
- 10 M. R. U. D. Biswas, A. Ali, K. Y. Cho and W.-C. Oh, *Ultrason. Sonochem.*, 2018, **42**, 738-746.
- 11 W. Wang, D. Xu, B. Cheng, J. Yu and C. Jiang, *J. Mater. Chem. A*, 2017, **5**, 5020-5029.
- 12 J.-S. Hwang, J.-S. Chang, S.-E. Park, K. Ikeue and M. Anpo, *Top Catal.*, 2005, **35**, 311-319.
- 13 F. Xu, J. Zhang, B. Zhu, J. Yu and J. Xu, *Appl. Catal. B: Environ.*, 2018, **230**, 194-202.
- 14 F.-Y. Fu, I. Shown, C.-S. Li, P. Raghunath, T.-Y. Lin, T. Billo, H.-L. Wu, C.-I. Wu, P.-W. Chung, M.-C. Lin, L.-C. Chen and K.-H. Chen, *ACS Appl. Mater. Interfaces*, 2019, **11**, 25186-25194.
- 15 W. Dai, J. Yu, H. Xu, X. Hu, X. Luo, L. Yang and X. Tu, *CrystEngComm*, 2016, **18**, 3472-3480.
- 16 J. Di, X. Zhao, C. Lian, M. Ji, J. Xia, J. Xiong, W. Zhou, X. Cao, Y. She, H. Liu, K. P. Loh, S. J. Pennycook, H. Li and Z. Liu, *Nano Energy*, 2019, **61**, 54-59.
- 17 Y.-F. Xu, M.-Z. Yang, B.-X. Chen, X.-D. Wang, H.-Y. Chen, D.-B. Kuang and C.-Y. Su, *J. Am. Chem. Soc.*, 2017, **139**, 5660-5663.
